# Supplementary material for: Multiple targeted self-emulsifying compound RGO reveals obvious anti-tumor potential in hepatocellular carcinoma
Source: PubMed Central journal article supplement — Mol Ther Oncolytics. 2021 Aug 19;22:604–16. doi: 10.1016/j.omto.2021.08.008 (PMC8449031; doi:10.1016/j.omto.2021.08.008), 2021-08-19
Supplement: mmc1.pdf [file mmc1.pdf]

**OMTO, Volume 22**

**Supplemental information**

**Multiple targeted self-emulsifying  
compound RGO reveals obvious anti-tumor  
potential in hepatocellular carcinoma**

**Sanxiu He, Shaorong Tian, Xiaoqian He, Xin Le, Yijiao Ning, Jialin Chen, Hongyi Chen, Junhao Mu, Ke Xu, Qin Xiang, Yue Wu, Jiong Chen, and Tingxiu Xiang**

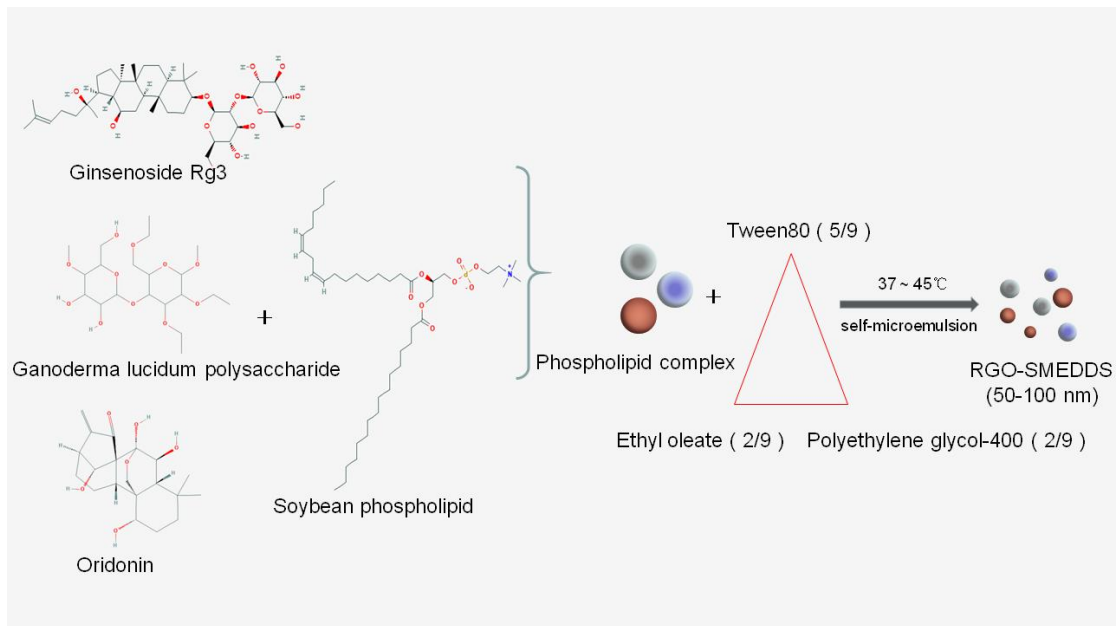

**Figure S1. Schematic illustration of the preparation of RGO-SMEDDS.**

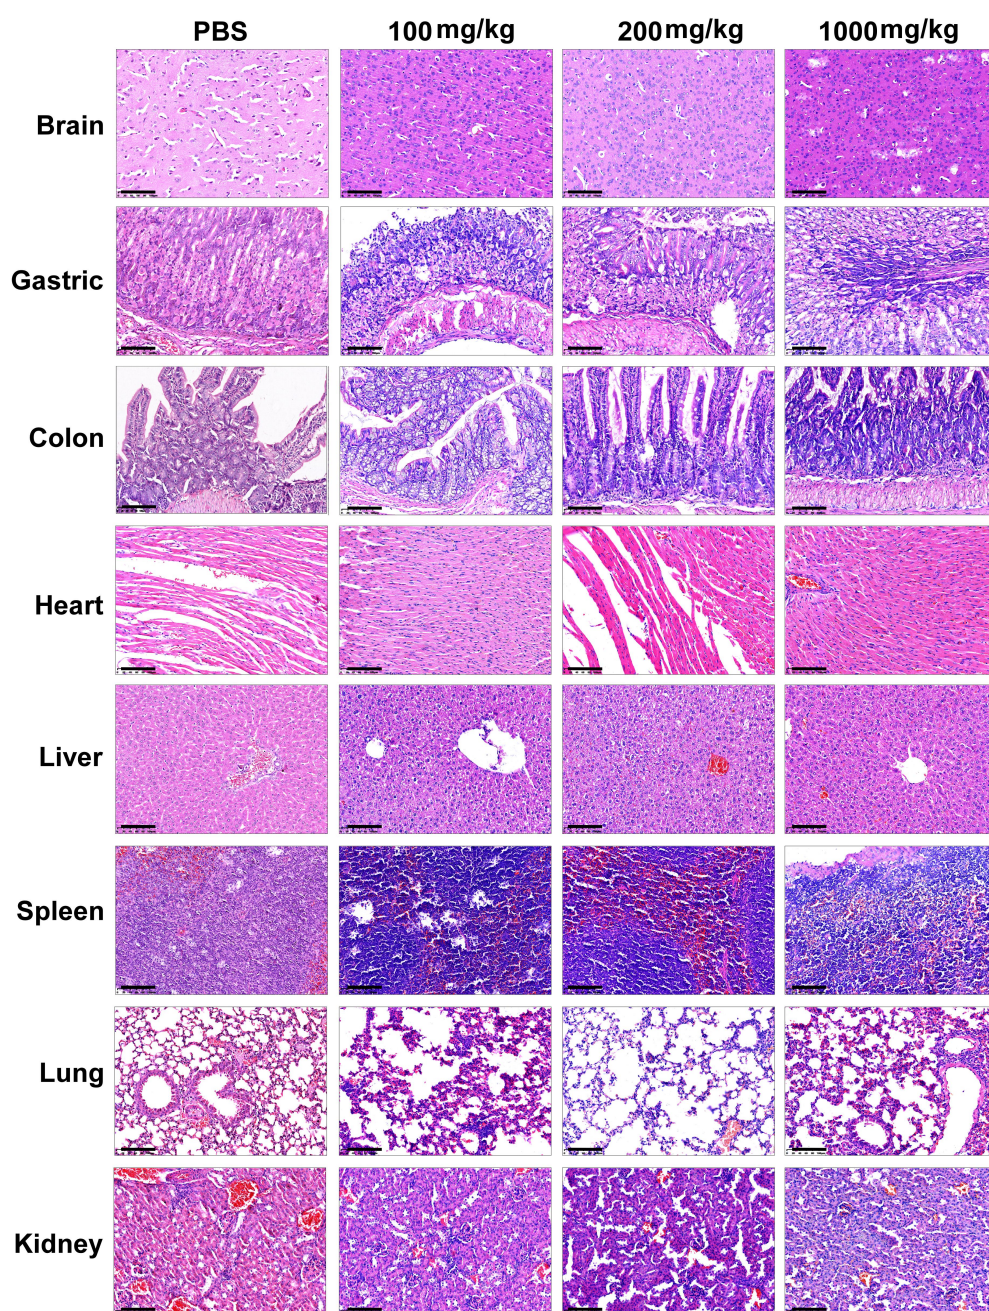

**Figure S2. RGO-SMEDDS in vivo toxicity**

HE staining results of major organs (brain, gastric, colon, heart, liver, spleen, lung and kidney) showing toxicity of RGO in vivo. C57BL/6 mice after one-time oral administration with ascending concentration order of 0, 100, 200, 1000mg/kg RGO.

Scale bar: 100  $\mu$ m.
